# Supplementary material for: TiO2 Nanoparticles/Nanotubes for Efficient Light Harvesting in Perovskite Solar Cells
Source: PubMed Central journal article supplement (PMC6473427; doi:10.3390/nano9030326), 2019-03-01
Supplement: nanomaterials-09-00326-s001.pdf [file nanomaterials-09-00326-s001.pdf]

# Supplementary Materials

## TiO<sub>2</sub> Nanoparticles/Nanotubes for Efficient Light Harvesting in Perovskite Solar Cells

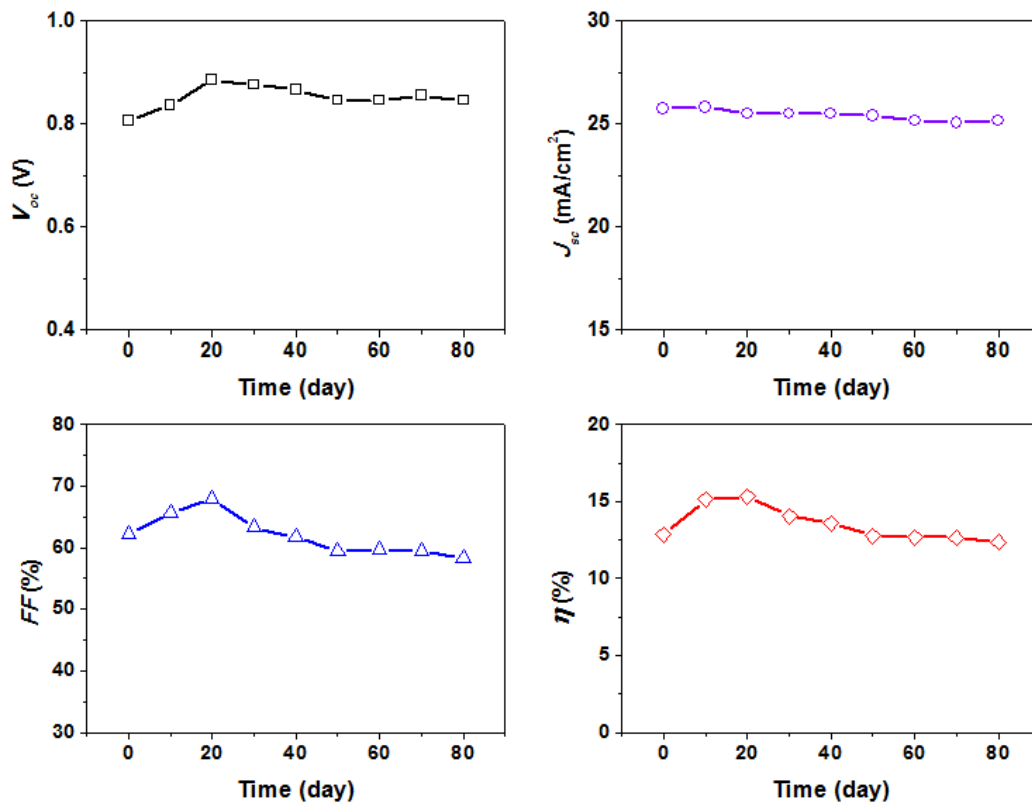

**Figure 1.** The stability of perovskite solar cells with 9 wt % of TiO<sub>2</sub> nanotubes in a TiO<sub>2</sub> composite film: (a)  $V_{oc}$ , (b)  $J_{sc}$ , (c)  $FF$ , and (d) efficiency ( $\eta$ ).

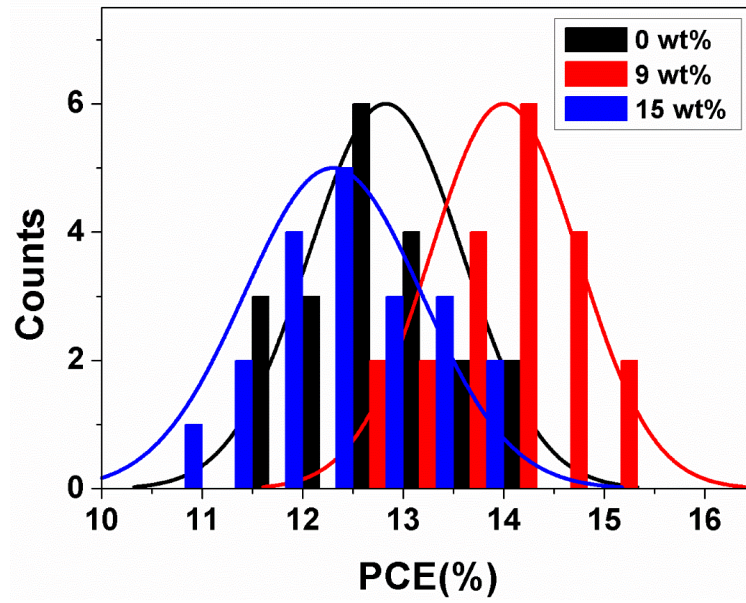

**Figure S2.** The histograms of power conversion efficiency (PCE) with 0 wt % (black), 9 wt % (red), and 15 wt % (blue) of TiO<sub>2</sub> nanotubes in the active layer.
